# Supplementary material
Source: PubMed Central journal article supplement (PMC3680364)

# MD-MBA-231

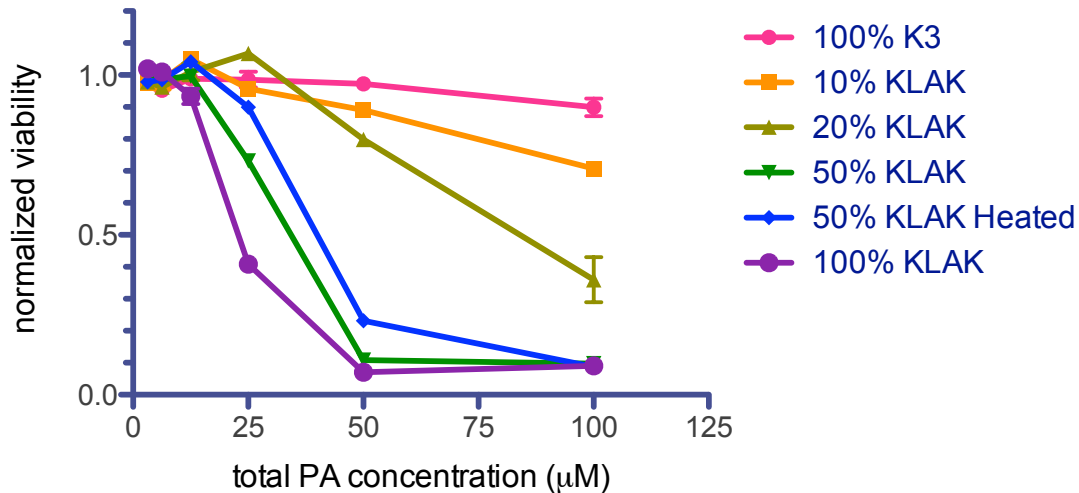

Supplement: NIHMS472858-supplement-S3.pdf [file NIHMS472858-supplement-S3.pdf]
